# Supplementary material for: A Redox Conjugated Polymer-Based All-Solid-State Reference Electrode
Source: PubMed Central journal article supplement (PMC6290589; doi:10.3390/polym10111191), 2018-10-25
Supplement: polymers-10-01191-s001.pdf [file polymers-10-01191-s001.pdf]

# A redox conjugated polymer-based all-solid-state reference electrode

Ke Qu<sup>1</sup>, Mingxi Fang<sup>2</sup>, Shuwei Zhang<sup>2</sup>, Haiying Liu<sup>2</sup>, Xiangqun Zeng\*<sup>1</sup>

1. Department of Chemistry, Oakland University, Rochester, Michigan 48309, United States
2. Department of Chemistry, Michigan Technological University, Houghton, Michigan 49931, United States

## Supplementary Materials

1. The synthesis scheme and <sup>1</sup>H, <sup>13</sup>C NMR spectra of the synthesized compounds.

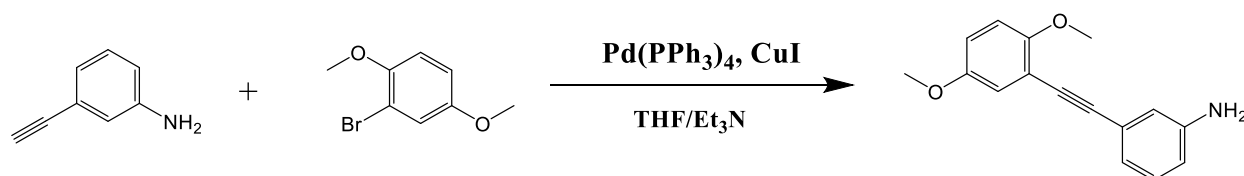

**Figure S1.** The synthesis scheme

To a N<sub>2</sub> protected 50ml round-bottom flask, Pd(PPh<sub>3</sub>)<sub>4</sub> (148 mg, 0.128 mmol, 5% eq), CuI (49 mg, 0.256 mmol, 10% eq), 3-Ethynyl aniline (300 mg, 2.56 mmol), 2-bromo-1,4-dimethoxybenzene (612 mg, 2.8 mmol) were dissolved in 12 mL THF/Et<sub>3</sub>N(3/1), then the reaction was heated to 60°C and stirred overnight. The solvents were removed via vacuum, the residue was extracted by ethyl acetate from water, dried over anhydrous sodium sulfate, finally purified by silica gel (R<sub>f</sub>=0.35) chromatography (hexane/EA=6/1) to obtain the targeted compound. <sup>1</sup>H NMR (400 MHz, CDCl<sub>3</sub>) δ 7.10 (t, *J* = 7.8 Hz, 1H), 7.01 (d, *J* = 2.4 Hz, 1H), 6.95 (d, *J* = 7.6 Hz, 1H), 6.88-6.84 (m, 1H), 6.83-6.79(m, 2H), 6.63 (d, *J* = 12.0 Hz, 1H), 3.85 (s, 3H), 3.76 (s, 3H), 3.66 (br, 2H); <sup>13</sup>C NMR (100 MHz, CDCl<sub>3</sub>) δ 154.7, 153.5, 146.4, 129.4, 124.3, 122.4, 118.3, 118.2, 115.9, 115.5, 113.4, 112.5, 94.6, 93.9, 56.8, 56.0.

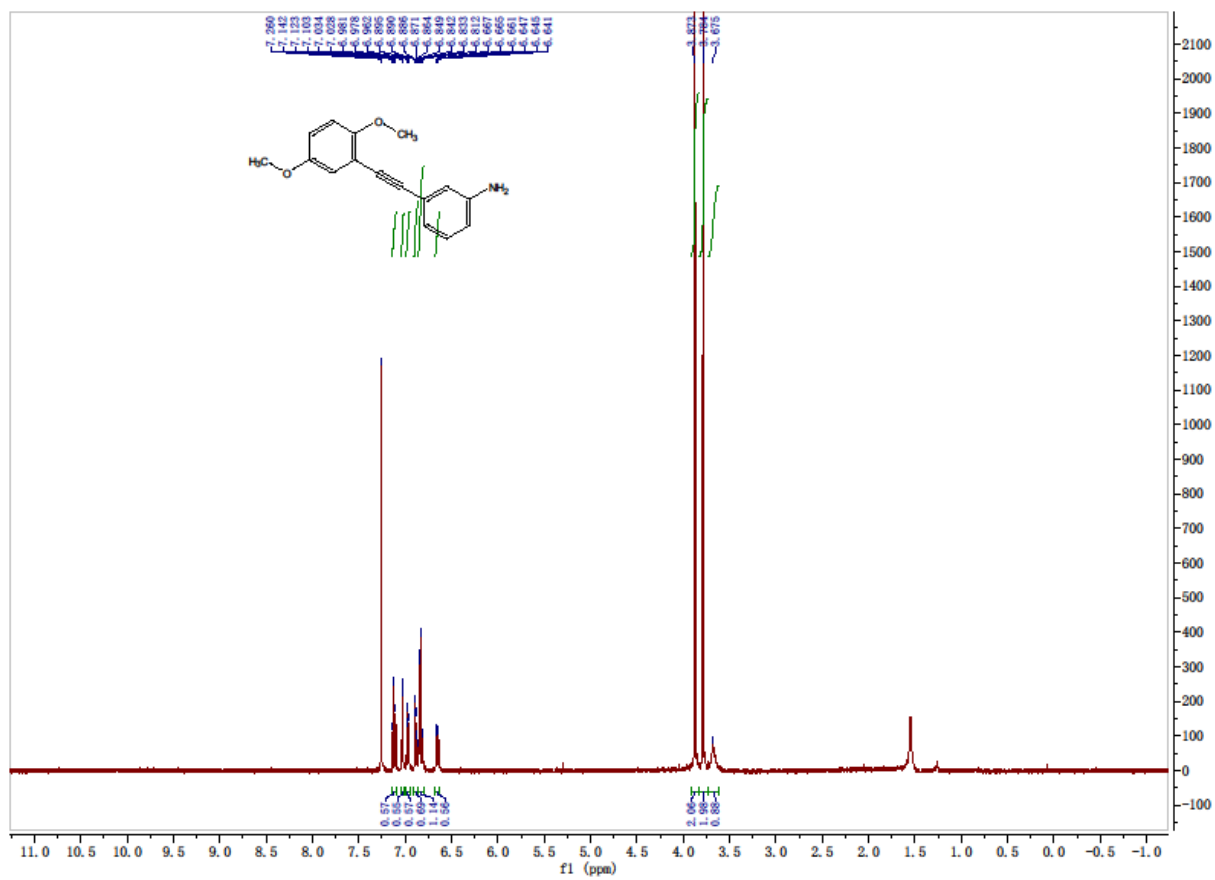

Figure S2.  $^1\text{H}$  NMR spectrum

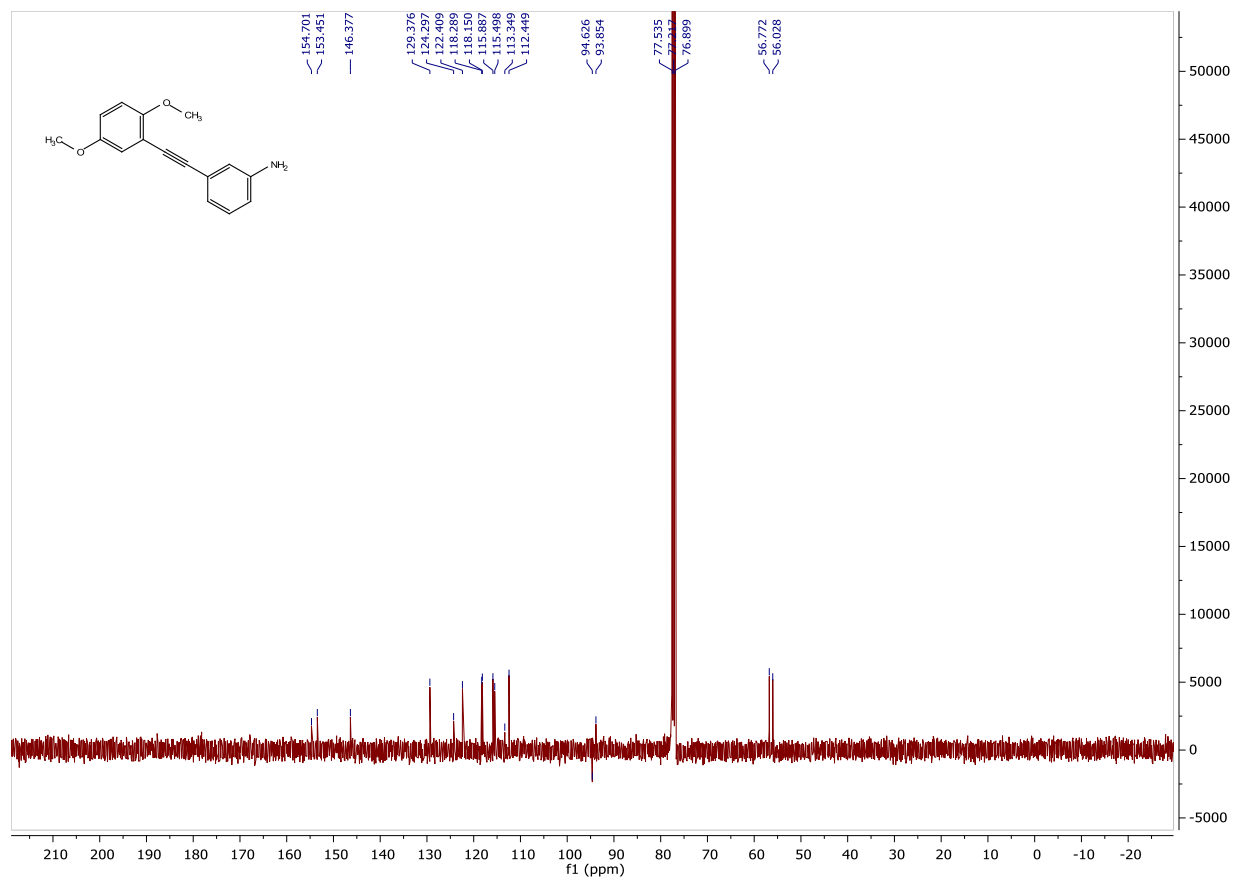

Figure S3.  $^{13}\text{C}$  NMR spectrum

FTL-14  
 [ Elemental Composition ]  
 Data : 16Feb02\_E02-002 Date : 02-Feb-2016 16:15 Page: 1  
 Sample: FTL-14  
 Note : 70eV  
 Inlet : Direct Ion Mode : EI+  
 RT : 0.29 min Scan#: (4,5)  
 Elements : C 400/0, H 800/0, O 2/2, N 1/1  
 Mass Tolerance : 10mmu  
 Unsaturation (U.S.) : -0.5 - 10000.0

| Observed m/z | Int%  | Err [ppm / mmu] | U.S. | Composition                |
|--------------|-------|-----------------|------|----------------------------|
| 253.1098     | 100.0 | -1.7 / -0.4     | 10.0 | C 16 H 15 O 2 N = 253.1103 |

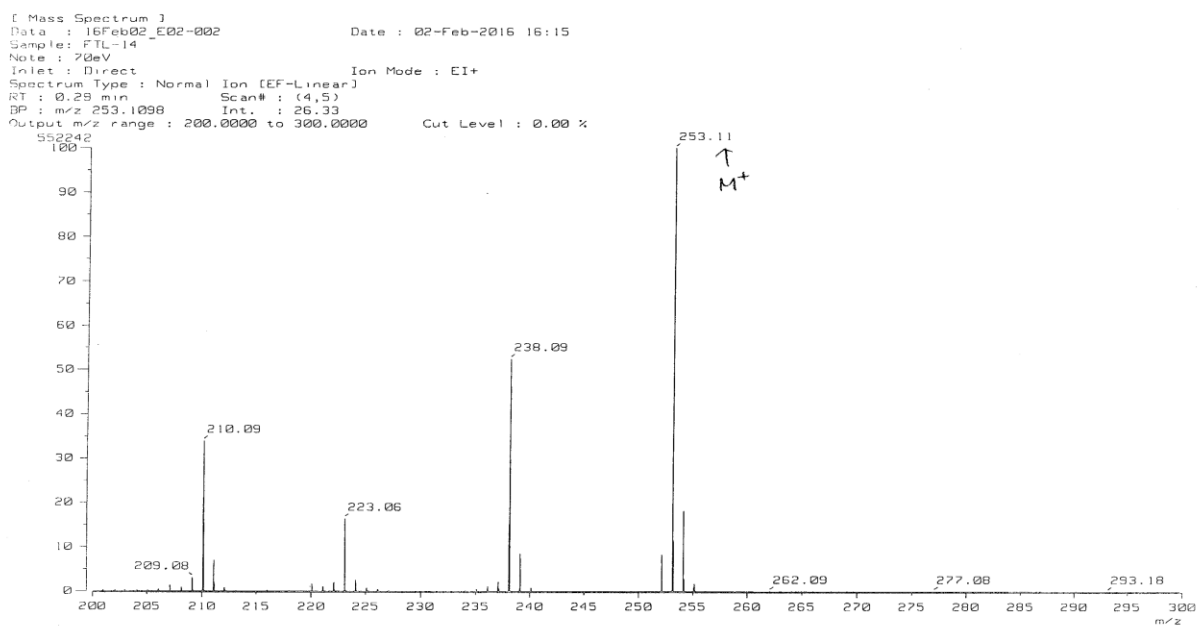

Figure S4. Mass spectrum

Aniline oxidation:

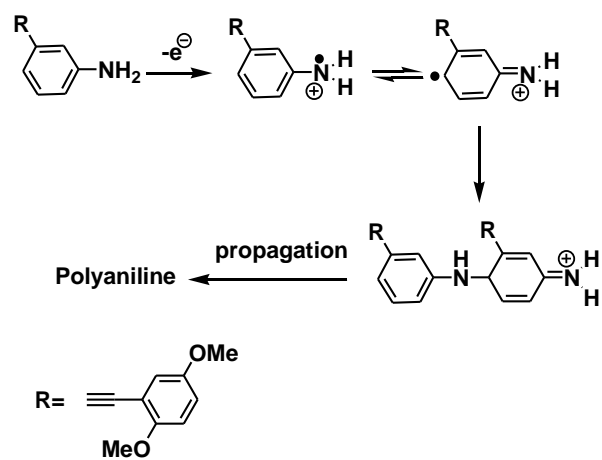

De-methylation by BBr<sub>3</sub>

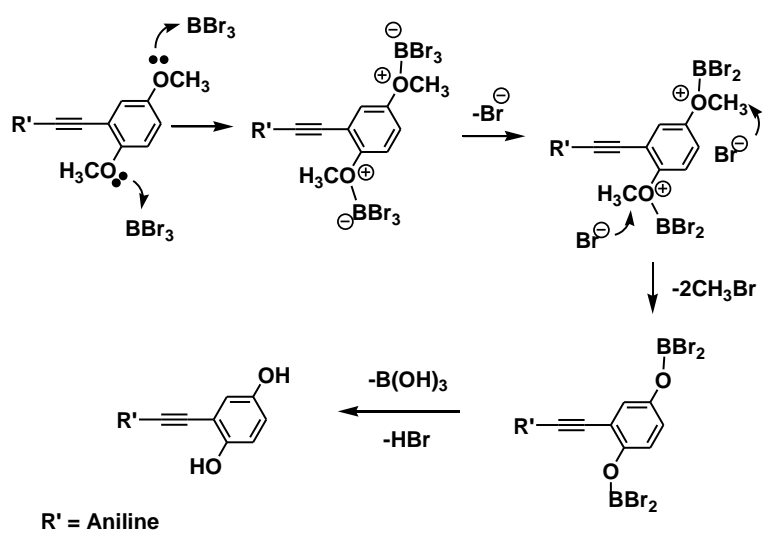

Figure S5. Mechanism of Aniline oxidation and de-methylation by BBr<sub>3</sub>

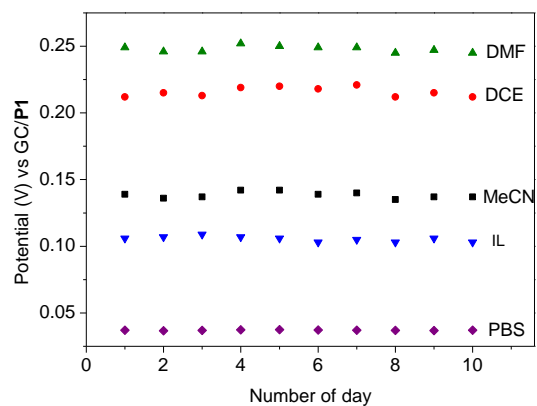

**Figure S6.** Stability of GC/P1 as RE in DMF, DCE, MeCN, [Bmim][NTf<sub>2</sub>] ionic liquid and PBS, with FcMeOH as redox probe and its average potentials plotted.
